# Supplementary material for: Multifunctional hollow polydopamine-based composites (Fe3O4/PDA@Ag) for efficient degradation of organic dyes
Source: Royal Society of Chemistry journal article supplement (doi:10.1039/c6ra05954f), 2016-01-01
Supplement: c6ra05954f1.pdf [file c6ra05954f1.pdf]

**Supplementary Information:**

**Multifunctional hollow polydopamine-based composites**

**(Fe<sub>3</sub>O<sub>4</sub>/PDA@Ag) for efficient degradation of organic dyes**

Bingqi Mao, Qingda An, Bin Zhai\*, Zuoyi Xiao, Shangru Zhai\*

*Faculty of Light Industry and Chemical Engineering, Dalian Polytechnic University,*

*Dalian 116034, China*

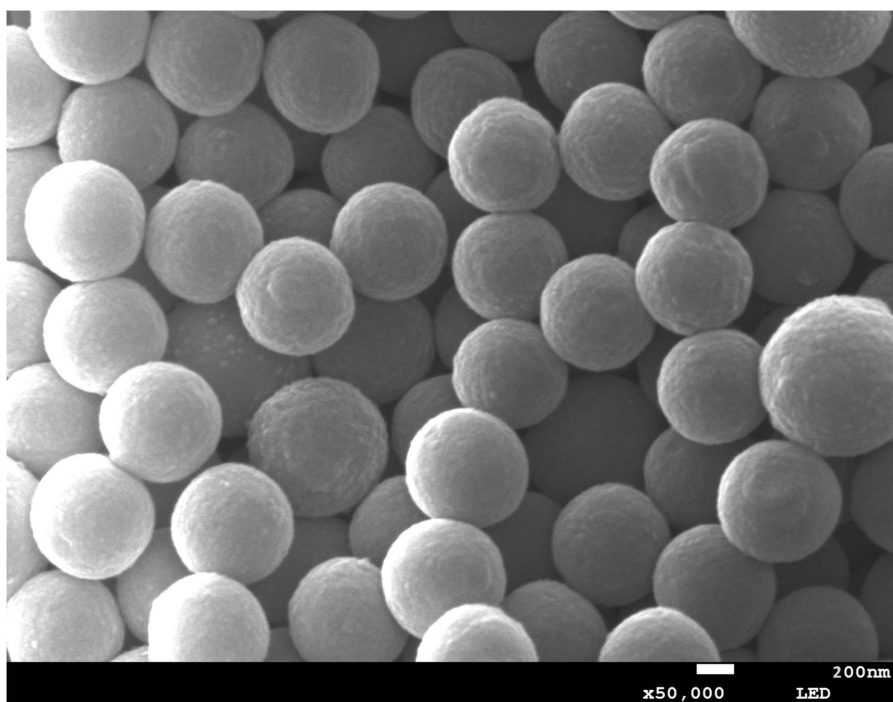

Fig S1. SEM image of PS-COOH microspheres.

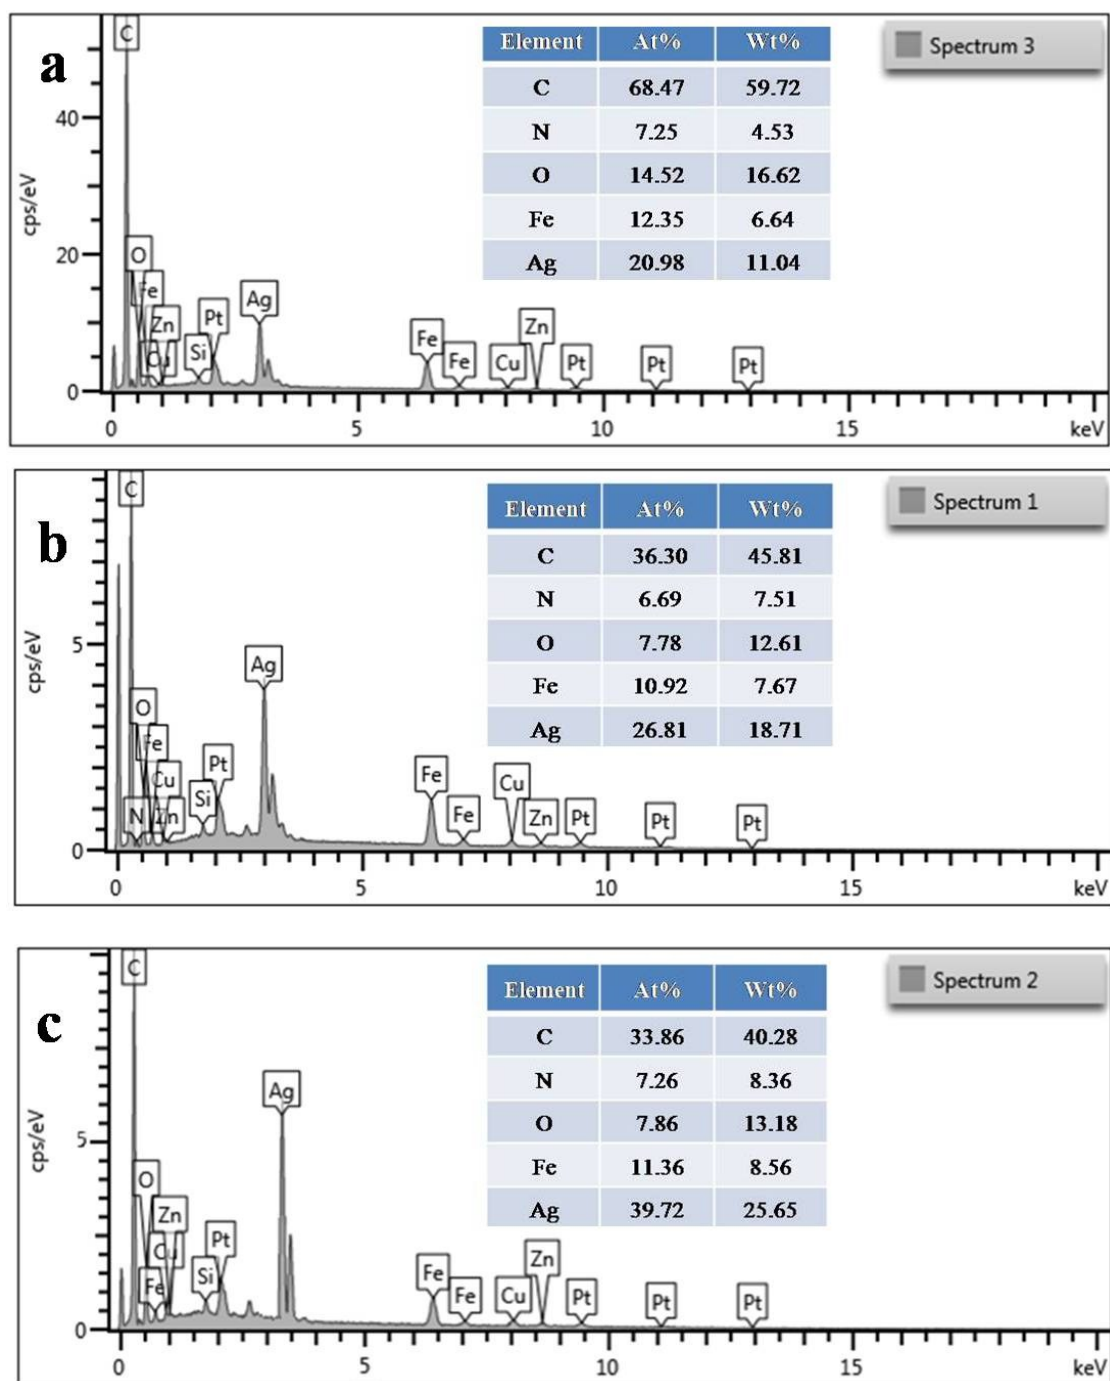

Fig S2. EDS analysis of (a)  $\text{Fe}_3\text{O}_4/\text{PDA}@\text{Ag}$  I hollow spheres; (b)  $\text{Fe}_3\text{O}_4/\text{PDA}@\text{Ag}$  II hollow spheres; (c)  $\text{Fe}_3\text{O}_4/\text{PDA}@\text{Ag}$  III hollow spheres.

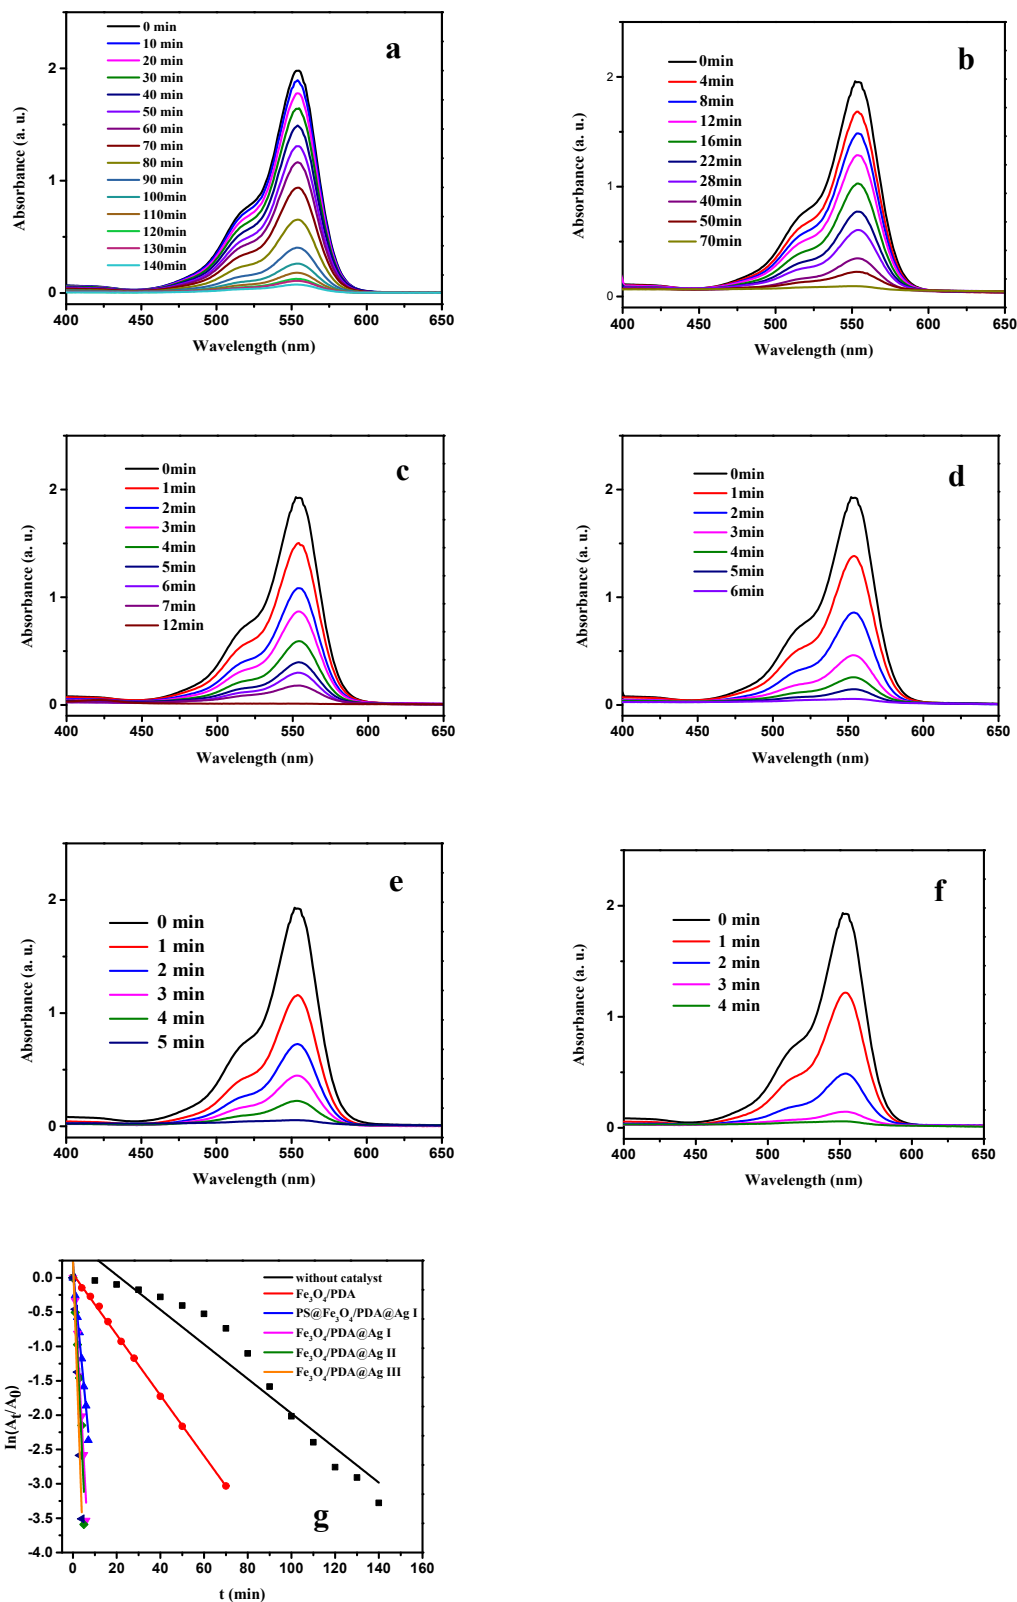

Fig S3. Time-dependent UV-Vis absorption spectra in the presence of (a) without catalyst; (b)  $\text{Fe}_3\text{O}_4/\text{PDA}$  hollow spheres; (c)  $\text{PS}@/\text{Fe}_3\text{O}_4/\text{PDA}@/\text{Ag}$  composites; (d)

---

Fe<sub>3</sub>O<sub>4</sub>/PDA@Ag I hollow spheres; (e) Fe<sub>3</sub>O<sub>4</sub>/PDA@Ag II hollow spheres; (f) Fe<sub>3</sub>O<sub>4</sub>/PDA@Ag III hollow spheres; (g) The relationship between  $\ln(A_t/A_0)$  and the reaction time at different conditions.

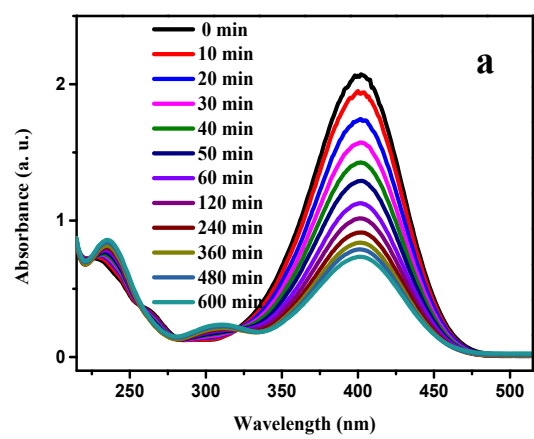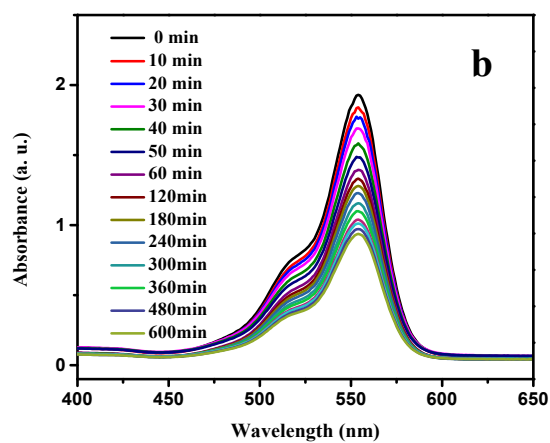

Fig. S4. Time-dependent UV-Vis absorption spectra in the presence of hollow  $\text{Fe}_3\text{O}_4/\text{PDA}@\text{Ag}$  I catalyst without nitrogen atmosphere in (a) 4-NP and (b) RhB reaction system.

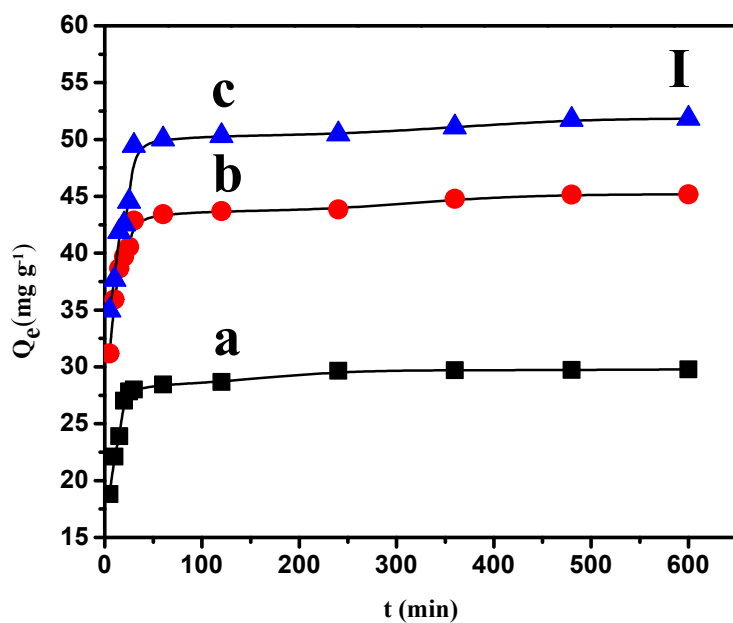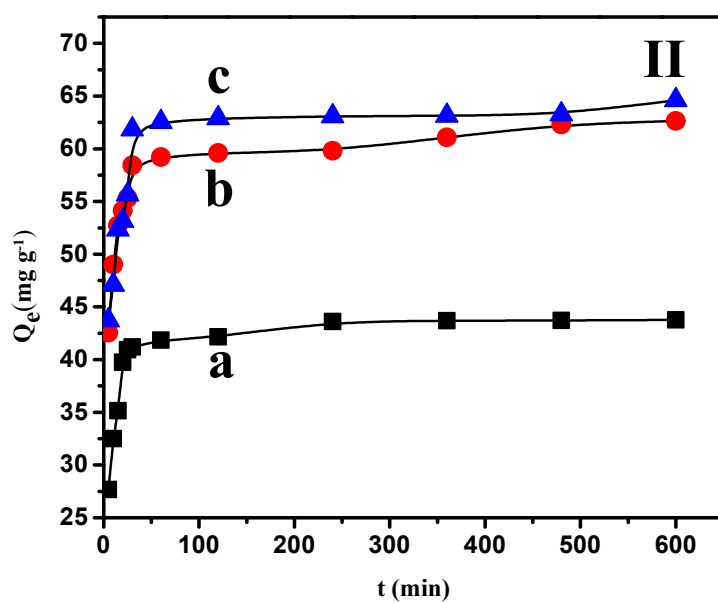

Fig. S5. Effect of contact time on the adsorption of (I) 4-NP and (II) RhB by (a) PS@Fe<sub>3</sub>O<sub>4</sub>/PDA@Ag, (b) Fe<sub>3</sub>O<sub>4</sub>/PDA@Ag I, and (c) Fe<sub>3</sub>O<sub>4</sub>/PDA (adsorbent dose, 0.01 g; initial 4-NP and RhB concentration, 500 mg L<sup>-1</sup>; volume, 20 mL; pH, 7.0 and temperature, 293± 2K ).

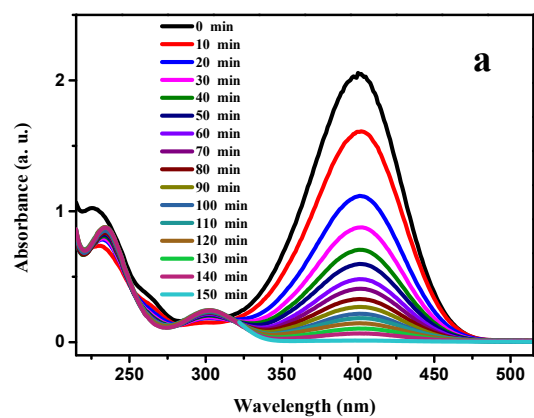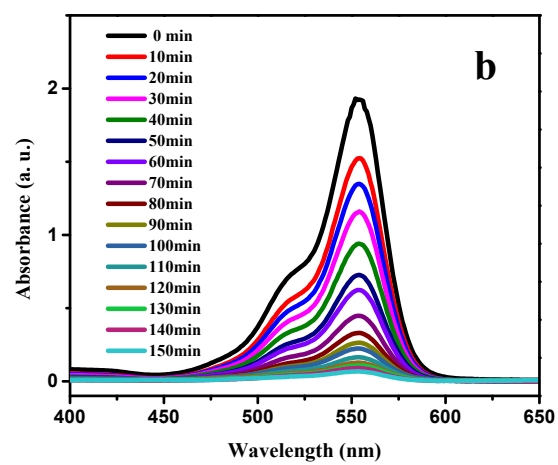

Fig. S6. Time-dependent UV-Vis absorption spectra in the presence of pure Fe<sub>3</sub>O<sub>4</sub>NPs in (a) 4-NP and (b) RhB reaction system.



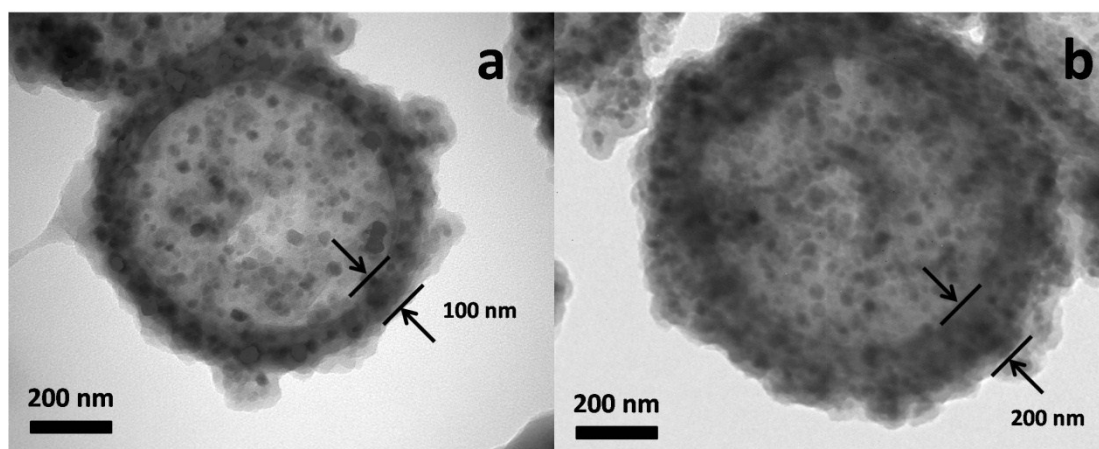

Fig S7. Magnified TEM image of (a)  $\text{Fe}_3\text{O}_4/\text{PDA}$  hollow spheres and (b)  $\text{Fe}_3\text{O}_4/\text{PDA}(200)$  hollow spheres.

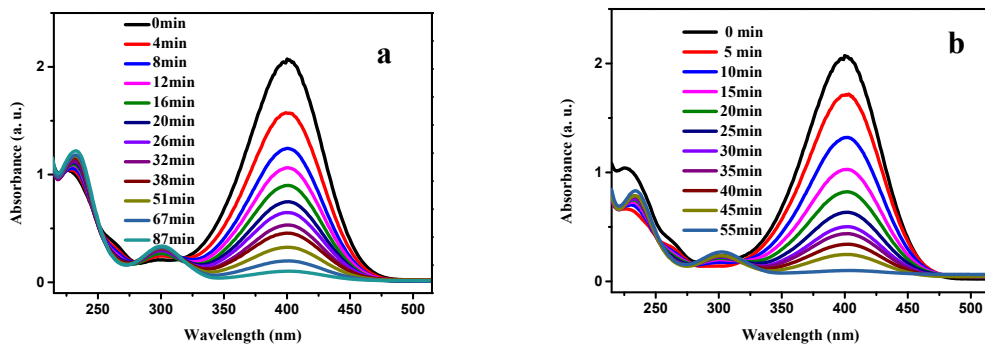

Fig. S8. Time-dependent UV-Vis absorption spectra in the presence of (a) Fe<sub>3</sub>O<sub>4</sub>/PDA hollow spheres and (b) Fe<sub>3</sub>O<sub>4</sub>/PDA(200) hollow spheres in 4-NP reaction system.

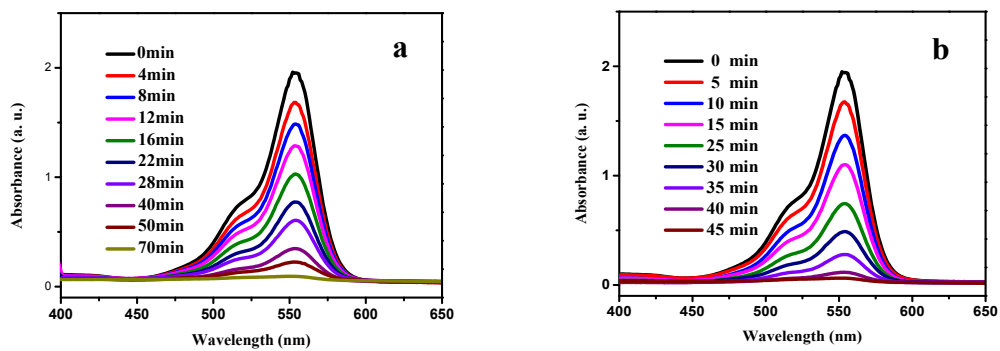

Fig. S9. Time-dependent UV-Vis absorption spectra in the presence of (a) Fe<sub>3</sub>O<sub>4</sub>/PDA hollow spheres and (b) Fe<sub>3</sub>O<sub>4</sub>/PDA(200) hollow spheres in RhB reaction system.

Table S1 Comparison of catalytic property of different catalysts in recent studies <sup>a</sup>.

| Catalyst                                   | Catalyst dosage | Ag NPs loading <sup>b</sup> | NaBH <sub>4</sub> dosage | 4-NP                  |                | RhB                   |                |
|--------------------------------------------|-----------------|-----------------------------|--------------------------|-----------------------|----------------|-----------------------|----------------|
|                                            | mg              | Wt%                         |                          | k(min <sup>-1</sup> ) | R <sup>2</sup> | k(min <sup>-1</sup> ) | R <sup>2</sup> |
| Without catalyst                           | 0               | 0                           | 1.3ml × 0.2M             | 0.017                 | 0.967          | 0.025                 | 0.923          |
| Fe <sub>3</sub> O <sub>4</sub> NPs         | 1.0             | 0                           | 1.3ml × 0.2M             | 0.021                 | 0.957          | 0.021                 | 0.908          |
| Fe <sub>3</sub> O <sub>4</sub> /PDA        | 1.0             | 0                           | 1.3ml × 0.2M             | 0.032                 | 0.985          | 0.044                 | 0.998          |
| Fe <sub>3</sub> O <sub>4</sub> /PDA(200)   | 1.0             | 0                           | 1.3ml × 0.2M             | 0.048                 | 0.976          | 0.072                 | 0.912          |
| PS@Fe <sub>3</sub> O <sub>4</sub> /PDA@Ag  | 1.0             | 8.97                        | 1.3ml × 0.2M             | 0.410                 | 0.991          | 0.333                 | 0.989          |
| Fe <sub>3</sub> O <sub>4</sub> /PDA@Ag I   | 1.0             | 11.04                       | 1.3ml × 0.2M             | 0.600                 | 0.995          | 0.582                 | 0.979          |
| Fe <sub>3</sub> O <sub>4</sub> /PDA@Ag II  | 1.0             | 18.71                       | 1.3ml × 0.2M             | 0.754                 | 0.845          | 0.668                 | 0.926          |
| Fe <sub>3</sub> O <sub>4</sub> /PDA@Ag III | 1.0             | 25.65                       | 1.3ml × 0.2M             | 0.888                 | 0.587          | 0.915                 | 0.974          |

<sup>a</sup> Reaction conditions: 25°C, pH = 7;

<sup>b</sup> Obtained from EDS.
